# Supplementary material for: Association between nutritional profiles of foods underlying Nutri-Score front-of-pack labels and mortality: EPIC cohort study in 10 European countries
Source: PubMed Central journal article supplement — BMJ. 2020 Sep 16;370:m3173. doi: 10.1136/bmj.m3173 (PMC7491938; doi:10.1136/bmj.m3173), 2020-09-16
Supplement: desm053086.ww.pdf [file desm053086.ww.pdf]

**Supplementary Methods. FSAm-NPS score computation at food/beverage level, FSAm-NPS DI computation at individual level and link to the Nutri-Score (‘Santé Publique France’).** DI, Dietary Index; FSAm-NPS, Nutrient Profiling System of the British Food Standards Agency

**1) FSAm-NPS score computation at food/beverage level**

Points are allocated according to the nutrient content for 100g of foods or beverages.

Points are allocated for ‘Negative’ nutrients (A points) and can be balanced according to ‘Positive’ nutrients (C points).

**A points**

Total A points = (points for energy) + (points for saturated fat) + (points for total sugar) + (points for sodium)

| <b>Points</b> | <b>Energy (kJ)</b> | <b>Saturated Fat (g)</b> | <b>Total Sugars (g)</b> | <b>Sodium (mg)</b> |
|---------------|--------------------|--------------------------|-------------------------|--------------------|
| 0             | ≤ 335              | ≤ 1                      | ≤ 4.5                   | ≤ 90               |
| 1             | > 335              | > 1                      | > 4.5                   | > 90               |
| 2             | > 670              | > 2                      | > 9                     | > 180              |
| 3             | > 1005             | > 3                      | > 13.5                  | > 270              |
| 4             | > 1340             | > 4                      | > 18                    | > 360              |
| 5             | > 1675             | > 5                      | > 22.5                  | > 450              |
| 6             | > 2010             | > 6                      | > 27                    | > 540              |
| 7             | > 2345             | > 7                      | > 31                    | > 630              |
| 8             | > 2680             | > 8                      | > 36                    | > 720              |
| 9             | > 3015             | > 9                      | > 40                    | > 810              |
| 10            | > 3350             | > 10                     | > 45                    | > 900              |

**C points**

Total C points = (points for fruits/vegetables/legumes/nuts) + (points for fibre) + (points for proteins)

| <b>Points</b> | <b>Fruits/vegetables/legumes/nuts (%)</b> | <b>Fibre (g) *</b> | <b>Protein (g)</b> |
|---------------|-------------------------------------------|--------------------|--------------------|
| 0             | ≤ 40                                      | ≤ 0.7              | ≤ 1.6              |
| 1             | > 40                                      | > 0.7              | > 1.6              |
| 2             | > 60                                      | > 1.4              | > 3.2              |
| 3             | -                                         | > 2.1              | > 4.8              |
| 4             | -                                         | > 2.8              | > 6.4              |
| 5             | > 80                                      | > 3.5              | > 8.0              |

\* FSAm-NPS score allocates different thresholds for fibre, depending on the measurement method used. We used NSP cut-offs to compute fibre score.

For 100g of a given food, the percentage of fruits/vegetables/legumes/nuts is obtained by summing up the amount (in grams) of all fruits, legumes and vegetables (including oleaginous fruits, dried fruits and olives) contained in this food.

**Overall score computation**

- If Total A points <11, then FSAm-NPS score =Total A points – Total C points
- If Total A points ≥11,
  - If points for fruits/vegetables/legumes/nuts =5, then FSAm-NPS score =Total A points – Total C points
  - Else if points for fruits/vegetables/legumes/nuts <5, then FSAm-NPS score = Total A points – (points for fibre + points for fruits/vegetables/legumes/nuts).

Exceptions were made for cheese, added fat, and drinks to better rank them according to their nutrient profile, consistently with nutritional recommendations:

**Score computation for cheese**

For cheese, the score takes in account the protein content, whether the A score reaches 11 or not, i.e.: FSAm-NPS score =Total A points – Total C points

**Score computation for added fat**

For added fat, the grid for point attribution is based on the percentage of saturated fat among total lipids (instead of saturated fat (g)) and has a six-point homogenous ascending step, as shown thereafter:

| <b>Points</b> | <b>Saturated Fat/Lipids (%)</b> |
|---------------|---------------------------------|
| 0             | < 10                            |
| 1             | < 16                            |
| 2             | < 22                            |
| 3             | < 28                            |
| 4             | < 34                            |
| 5             | < 40                            |
| 6             | < 46                            |
| 7             | < 52                            |
| 8             | < 58                            |
| 9             | < 64                            |
| 10            | ≥ 64                            |

Points attribution for the other nutrients follows the grid displayed in “A points” and “C points” above.

### **Score computation for drinks**

For drinks, the grids for point attribution regarding energy, sugars and fruits/vegetables/ legumes/nuts (%) were modified.

| <b>Points</b> | <b>Energy (kJ)</b> | <b>Sugars (g)</b> | <b>Fruits/vegetables/legumes/nuts (%)</b> |
|---------------|--------------------|-------------------|-------------------------------------------|
| 0             | ≤ 0                | ≤ 0               | < 40                                      |
| 1             | ≤ 30               | ≤ 1.5             |                                           |
| 2             | ≤ 60               | ≤ 3               | > 40                                      |
| 3             | ≤ 90               | ≤ 4.5             |                                           |
| 4             | ≤ 120              | ≤ 6               | > 60                                      |
| 5             | ≤ 150              | ≤ 7.5             |                                           |
| 6             | ≤ 180              | ≤ 9               |                                           |
| 7             | ≤ 210              | ≤ 10.5            |                                           |
| 8             | ≤ 240              | ≤ 12              |                                           |
| 9             | ≤ 270              | ≤ 13.5            |                                           |
| 10            | > 270              | > 13.5            | > 80                                      |

Points attribution for the other nutrients follows the grid displayed in “A points” and “C points” above.

Given the modification of the grid for fruit and vegetables for beverages, the threshold in the final computation to take into account protein content is set at 10 points:

- If Total A points < 11, then FSAm-NPS score = Total A points – Total C points
  - If Total A points ≥ 11,
    - If points for fruits/vegetables/legumes/nuts = 10, then FSAm-NPS score = Total A points – Total C points
    - Else if points for fruits/vegetables/legumes/nuts < 10, then FSAm-NPS score = Total A points – (points for fibre + points for fruits/vegetables/legumes/nuts).

Milk and vegetable milk are not concerned by this exception. Their scores are computed using the overall score computation system.

## **2) FSAm-NPS DI computation at individual level**

The FSAm-NPS DI is computed at the individual level as an energy-weighted mean of the FSAm-NPS scores of all foods and beverages consumed, using the following equation [1] (FS<sub>i</sub>: score of food/beverage i, E<sub>i</sub>: energy intake from food/beverage i, n: number of food/beverage consumed)

$$\text{FSAm-NPS DI} = \frac{\sum_{i=1}^n (\text{FS}_i E_i)}{\sum_{i=1}^n E_i}$$

Higher FSAm-NPS DI therefore reflects lower nutritional quality in foods consumed.

Energy was chosen to weight the FSAm-NPS DI over food quantity (in grams) or portion size, as previously published [1-8]. Weighting by quantity gives excessive and disproportionate weight to water and thus to beverages and foods with high water content, as tested previously [9]. Weighting by portion size was not chosen because no standardized portion sizes have been defined at the EU level and it is therefore difficult to define a reference portion size to build the score.

### 3) Example of FSAm-NPS score computation and link to the Nutri-Score ('Santé Publique France')

#### *Food/beverage composition*

|                    | A points    |                   |                  |             | C points    |           |                                    |
|--------------------|-------------|-------------------|------------------|-------------|-------------|-----------|------------------------------------|
|                    | Energy (kJ) | Saturated Fat (g) | Total Sugars (g) | Sodium (mg) | Protein (g) | Fibre (g) | Fruits/vegetables/legumes/nuts (%) |
| <b>Food</b>        |             |                   |                  |             |             |           |                                    |
| Fennel boiled      | 104.7       | 0                 | 0.15             | 73.8        | 1.69        | 2.92      | 100                                |
| Anchovy in vinegar | 439.6       | 1.26              | 0.03             | 307.9       | 18.4        | 0         | 0                                  |
| Salami             | 2097.6      | 17.5              | 0.13             | 1817.3      | 26.0        | 0         | 0                                  |
| <b>Beverage</b>    |             |                   |                  |             |             |           |                                    |
| Orange juice fresh | 192.6       | 0.02              | 5.50             | 1           | 0.7         | 0.1       | 100                                |
| Cola, regular      | 227.6       | 0                 | 10.51            | 4.18        | 3.03        | 0         | 0                                  |

#### *Attribution of points*

|                    | A points    |                   |                  |             | C points    |           |                                    |
|--------------------|-------------|-------------------|------------------|-------------|-------------|-----------|------------------------------------|
|                    | Energy (kJ) | Saturated Fat (g) | Total Sugars (g) | Sodium (mg) | Protein (g) | Fibre (g) | Fruits/vegetables/legumes/nuts (%) |
| <b>Food</b>        |             |                   |                  |             |             |           |                                    |
| Fennel boiled      | 0           | 0                 | 0                | 0           | 1           | 4         | 5                                  |
| Anchovy in vinegar | 1           | 1                 | 0                | 3           | 5           | 0         | 0                                  |
| Salami             | 6           | 10                | 0                | 10          | 5           | 0         | 0                                  |
| <b>Beverage</b>    |             |                   |                  |             |             |           |                                    |
| Orange juice fresh | 7           | 0                 | 4                | 0           | 0           | 0         | 10                                 |
| Cola, regular      | 8           | 0                 | 8                | 0           | 1           | 0         | 0                                  |

#### *FSAm-NPS score and Attribution of Nutri-Score colours*

| Foods (points) | Beverages (points) | Colour       |                                    |
|----------------|--------------------|--------------|------------------------------------|
| Min to -1      | Water              | Dark green   | <i>Highest nutritional quality</i> |
| 0 to 2         | Min to 1           | Light green  |                                    |
| 3 to 10        | 2 to 5             | Yellow       |                                    |
| 11 to 18       | 6 to 9             | Light orange |                                    |
| 19 to max      | 10 to max          | Dark orange  | <i>Lowest nutritional quality</i>  |

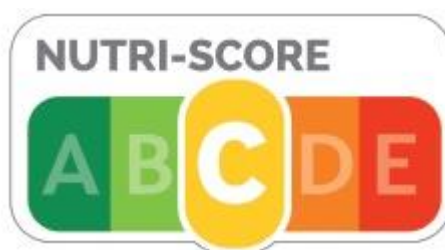

|                    | FSAm-NPS score                                                   |            | Nutri-Score colour |
|--------------------|------------------------------------------------------------------|------------|--------------------|
| <b>Food</b>        |                                                                  |            |                    |
| Fennel boiled      | A points – C points                                              | <b>-10</b> | Dark green         |
| Anchovy in vinegar | A points – C points                                              | <b>0</b>   | Light green        |
| Salami             | A points – points (fibre)<br>– points (fruits/ veg./ leg./ nuts) | <b>26</b>  | Dark orange        |
| <b>Beverage</b>    |                                                                  |            |                    |
| Orange juice fresh | A points – C points                                              | <b>1</b>   | Light green        |
| Cola, regular      | A points – points (fibre)<br>– points (fruits/ veg./ leg./ nuts) | <b>16</b>  | Dark orange        |

**Examples of food products classified according to their Nutri-Score and corresponding FSAm-NPS score range**

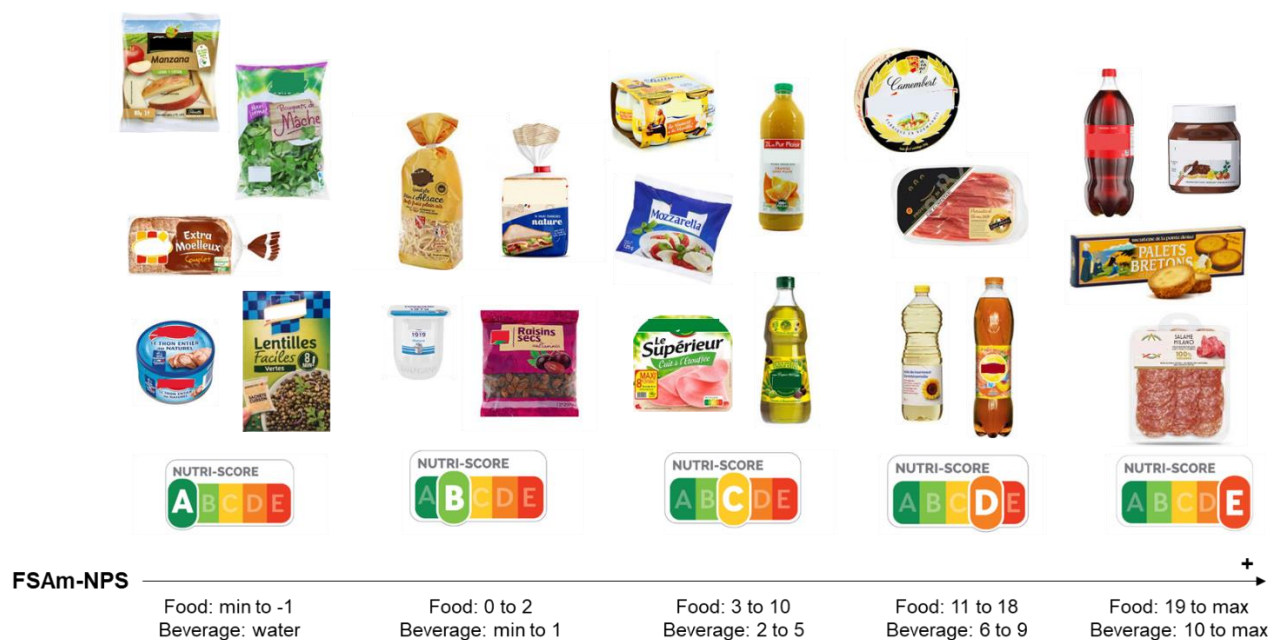

**References**

- (1) Julia C, Touvier M, Mejean C, Ducrot P, Peneau S, Hercberg S, et al. Development and validation of an individual dietary index based on the British Food Standard Agency nutrient profiling system in a French context. *J Nutr.* 2014;144:2009-17.
- (2) Adriouch S, Julia C, Kesse-Guyot E, Mejean C, Ducrot P, Peneau S, et al. Prospective association between a dietary quality index based on a nutrient profiling system and cardiovascular disease risk. *Eur J Prev Cardiol.* 2016;23:1669-76.
- (3) Adriouch S, Julia C, Kesse-Guyot E, Ducrot P, Peneau S, Mejean C, et al. Association between a dietary quality index based on the food standard agency nutrient profiling system and cardiovascular disease risk among French adults. *Int J Cardiol.* 2017;234:22-7.
- (4) Deschasaux M, Julia C, Kesse-Guyot E, Lecuyer L, Adriouch S, Mejean C, et al. Are self-reported unhealthy food choices associated with an increased risk of breast cancer? Prospective cohort study using the British Food Standards Agency nutrient profiling system. *BMJ Open.* 2017;7:e013718.
- (5) Donnenfeld M, Julia C, Kesse-Guyot E, Mejean C, Ducrot P, Peneau S, et al. Prospective association between cancer risk and an individual dietary index based on the British Food Standards Agency Nutrient Profiling System. *Br J Nutr.* 2015;114:1702-10.

- (6) Julia C, Ducrot P, Lassale C, Fezeu L, Mejean C, Peneau S, et al. Prospective associations between a dietary index based on the British Food Standard Agency nutrient profiling system and 13-year weight gain in the SU.VI.MAX cohort. *Prev Med.* 2015;81:189-94.
- (7) Julia C, Mejean C, Touvier M, Peneau S, Lassale C, Ducrot P, et al. Validation of the FSA nutrient profiling system dietary index in French adults-findings from SUVIMAX study. *Eur J Nutr.* 2016;55:1901-10.
- (8) Julia C, Fezeu LK, Ducrot P, Mejean C, Peneau S, Touvier M, et al. The Nutrient Profile of Foods Consumed Using the British Food Standards Agency Nutrient Profiling System Is Associated with Metabolic Syndrome in the SU.VI.MAX Cohort. *J Nutr.* 2015;145:2355-61.
- (9) Scarborough P, Arambepola C, Kaur A, Bhatnagar P, Rayner M. Should nutrient profile models be 'category specific' or 'across-the-board'? A comparison of the two systems using diets of British adults. *Eur J Clin Nutr.* 2010;64:553-60.

**Supplementary Figure 1. Participants flowchart, EPIC cohort, 1992–2015.**

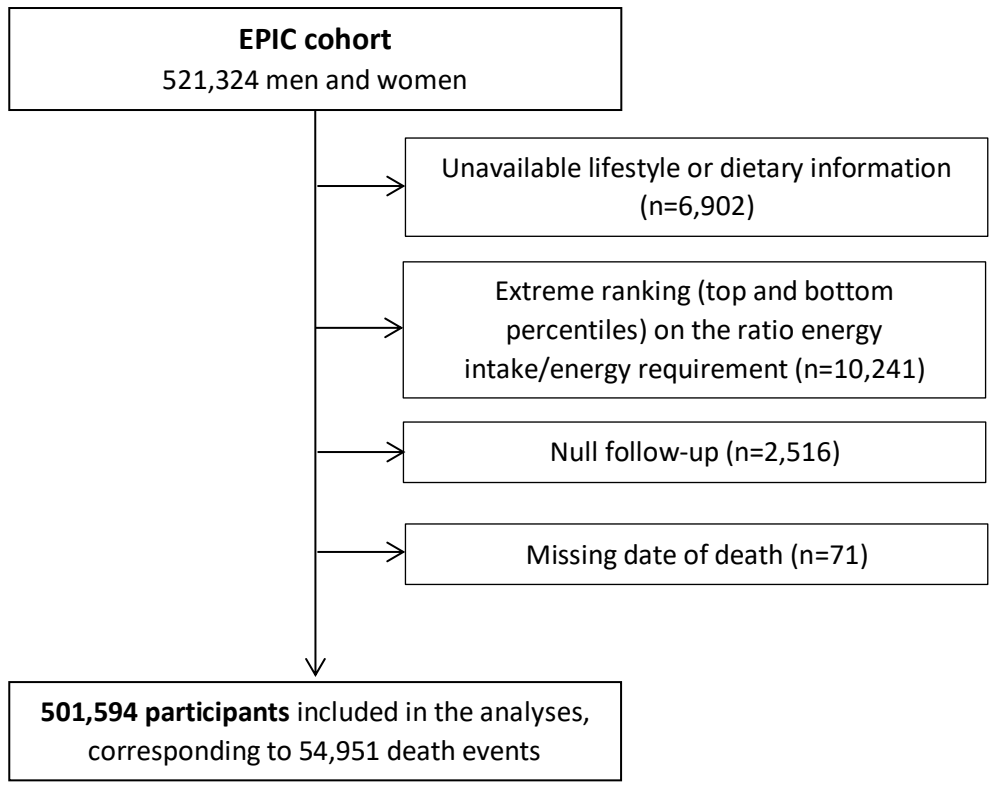

**Supplementary Figure 2. Schoenfeld residuals according to follow-up time (years) for quintiles of the FSAm-NPS DI, EPIC cohort, 1992–2015.** A higher FSAm-NPS DI indicates a lower nutritional quality of the foods consumed. The solid blue curve represents the smooth curve and its 95% confidence interval. Abbreviations: DI, Dietary Index; EPIC, European Prospective Investigation into Cancer and Nutrition; FSAm-NPS, Nutrient Profiling System of the British Food Standards Agency (modified version).

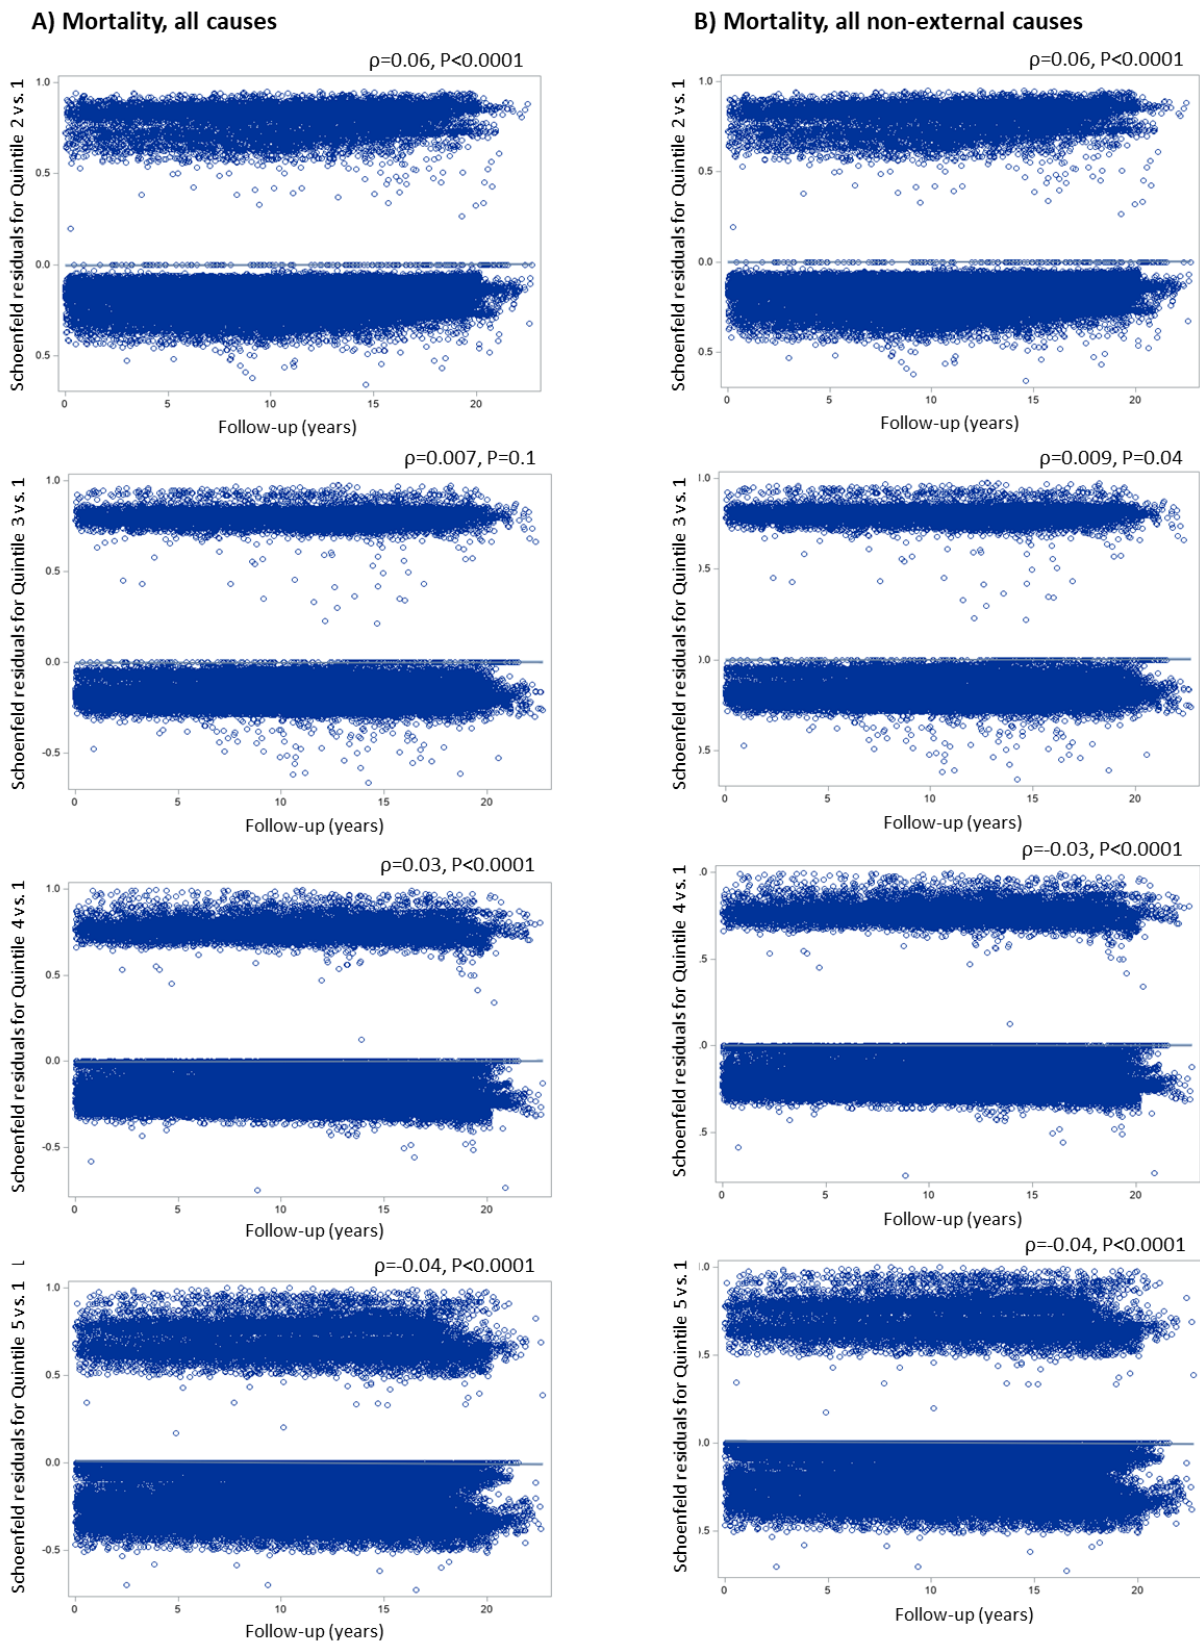

**C) Mortality from external causes**

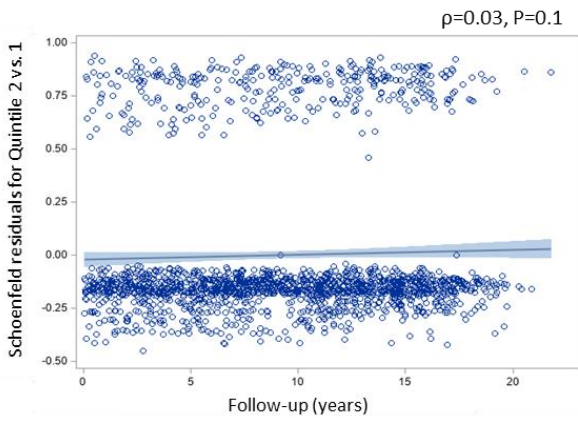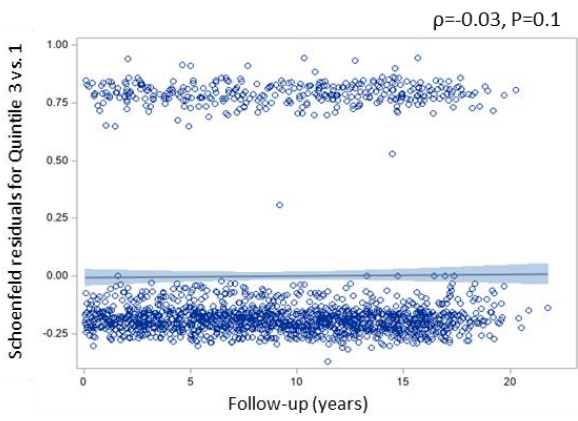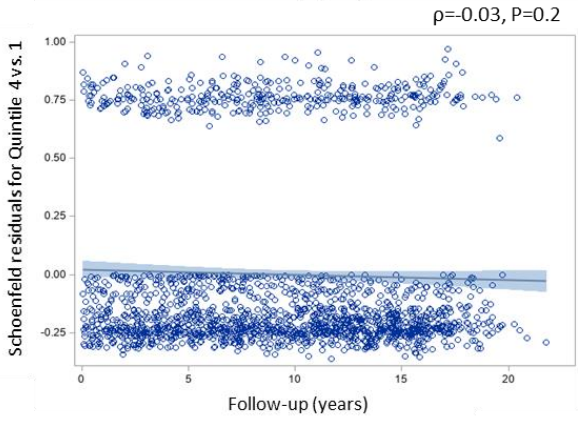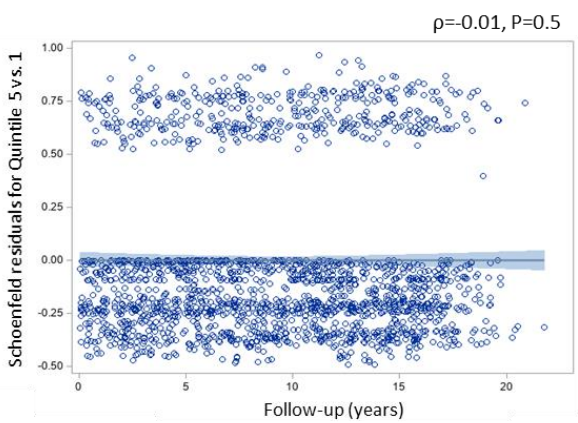

**D) Mortality from cancer**

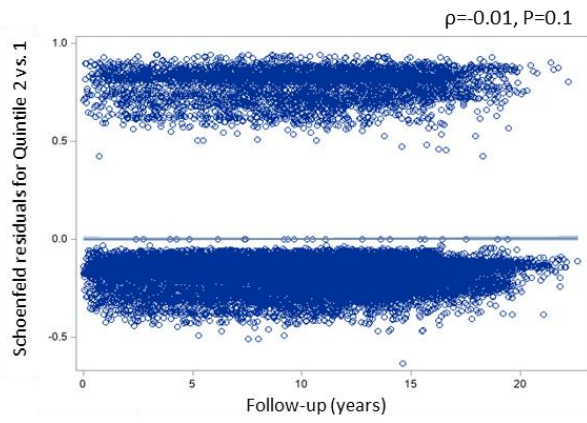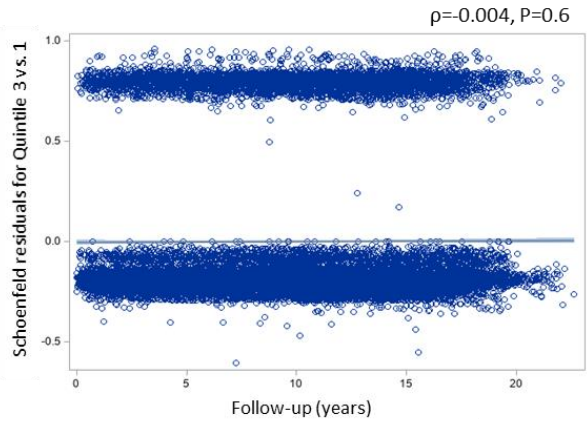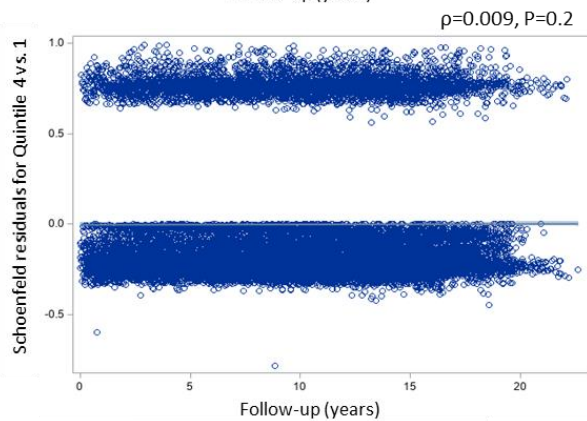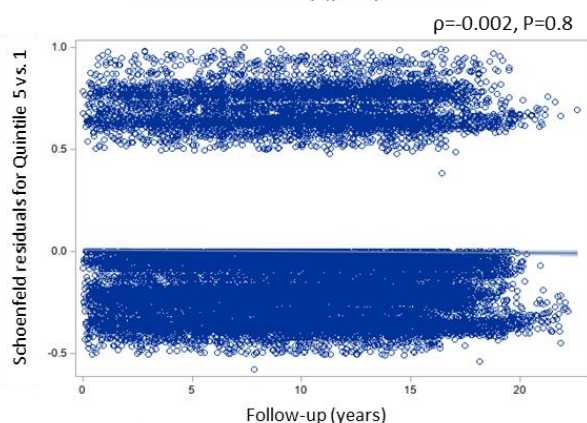



### E) Mortality from cardiovascular diseases

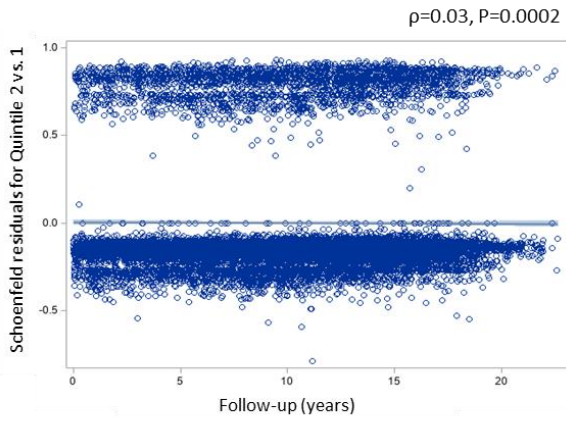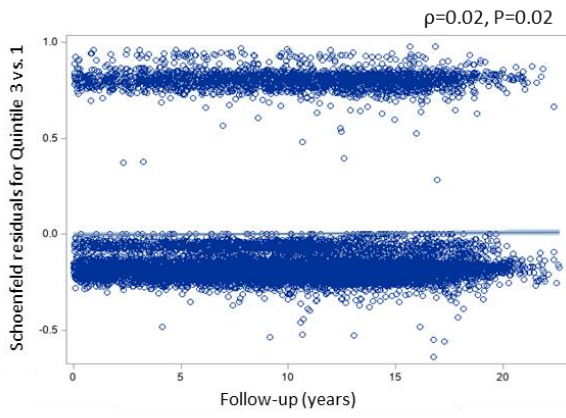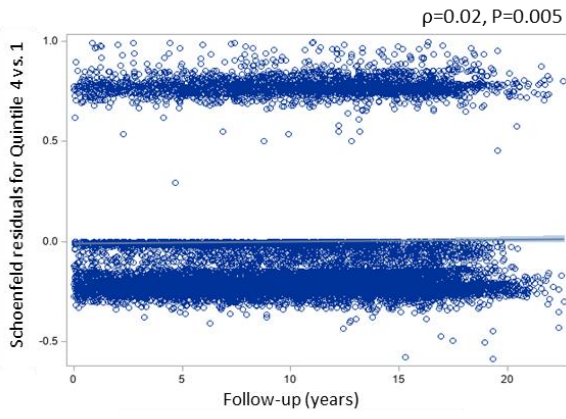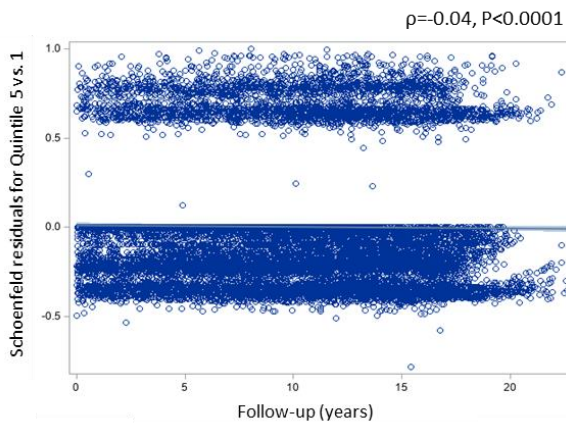

### F) Mortality from respiratory diseases

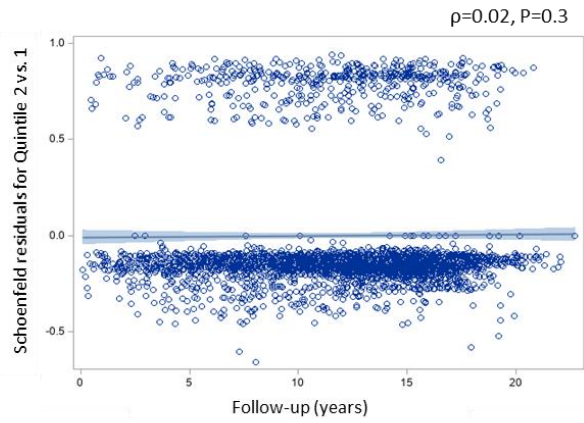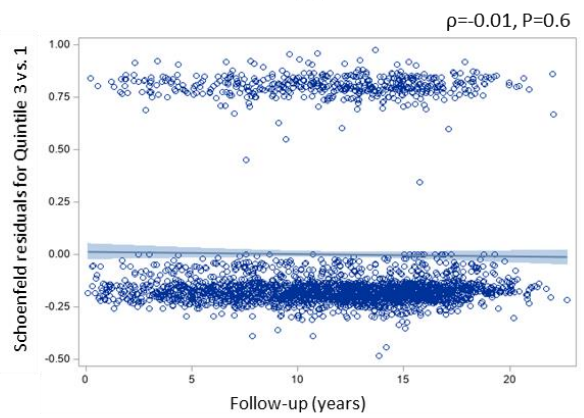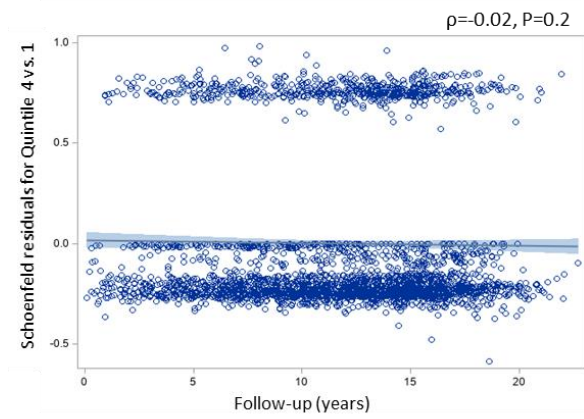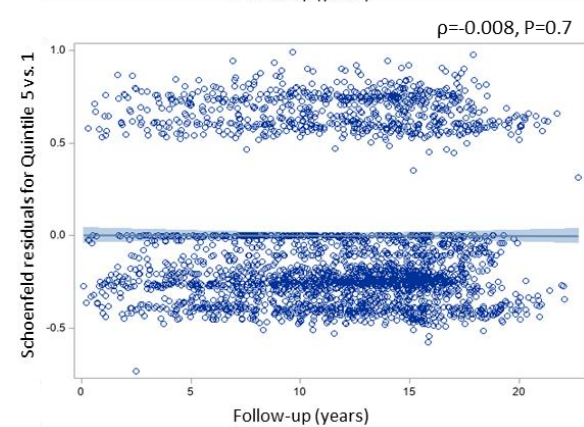

### G) Mortality from digestive diseases

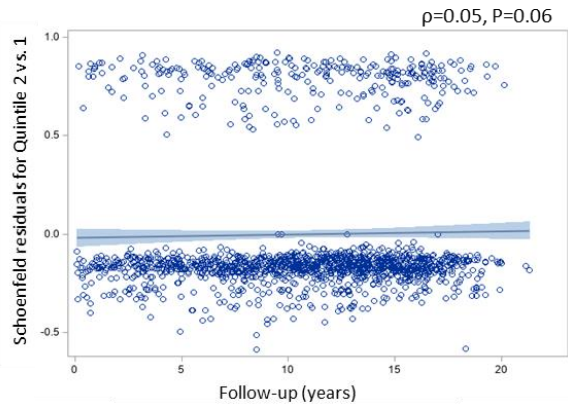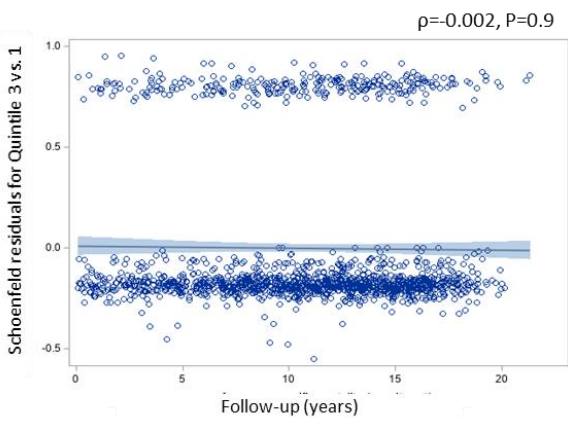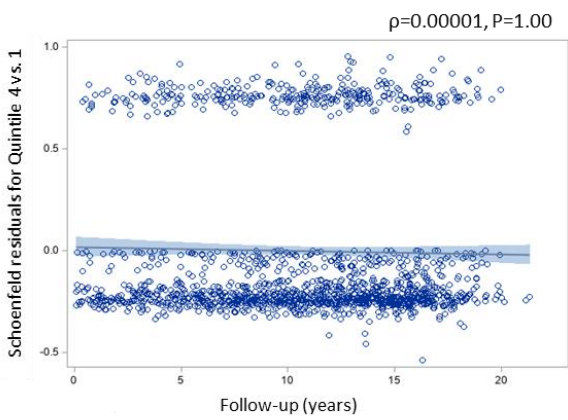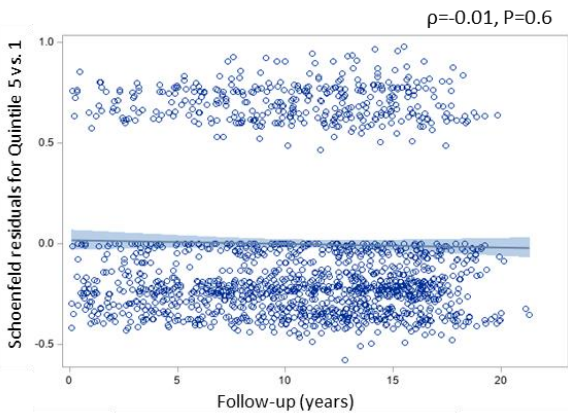

**Supplementary Figure 3. Associations between the FSAm-NPS DI and mortality from all non-external causes, by country, EPIC cohort, 1992–2015.** A higher FSAm-NPS DI indicates a lower nutritional quality of the foods consumed. The Cox proportional hazard model was stratified for age (1-y interval) and study centre and adjusted for age (time-scale), sex, body mass index, height, educational level (longer education, including university degree; technical/professional school; secondary school; primary school; missing), combined total physical activity (sex-specific categories: active; moderately active; moderately inactive; inactive; missing), smoking status and intensity of smoking (current, 1–15 cigarettes/d; current, 16–25 cigarettes/d; current, 26+ cigarettes/d; current, pipe/cigar/occasional; current/former, missing; former, quit 11–20 y; former, quit 20+y; former, quit  $\leq 10$  y; non-smoker; missing), baseline alcohol intake, baseline energy intake and personal history of cancer (yes; no), cardiovascular diseases (yes; no; missing) and diabetes (yes; no; missing). Abbreviations: DI, Dietary Index; EPIC, European Prospective Investigation into Cancer and Nutrition; FSAm-NPS, Nutrient Profiling System of the British Food Standards Agency (modified version).

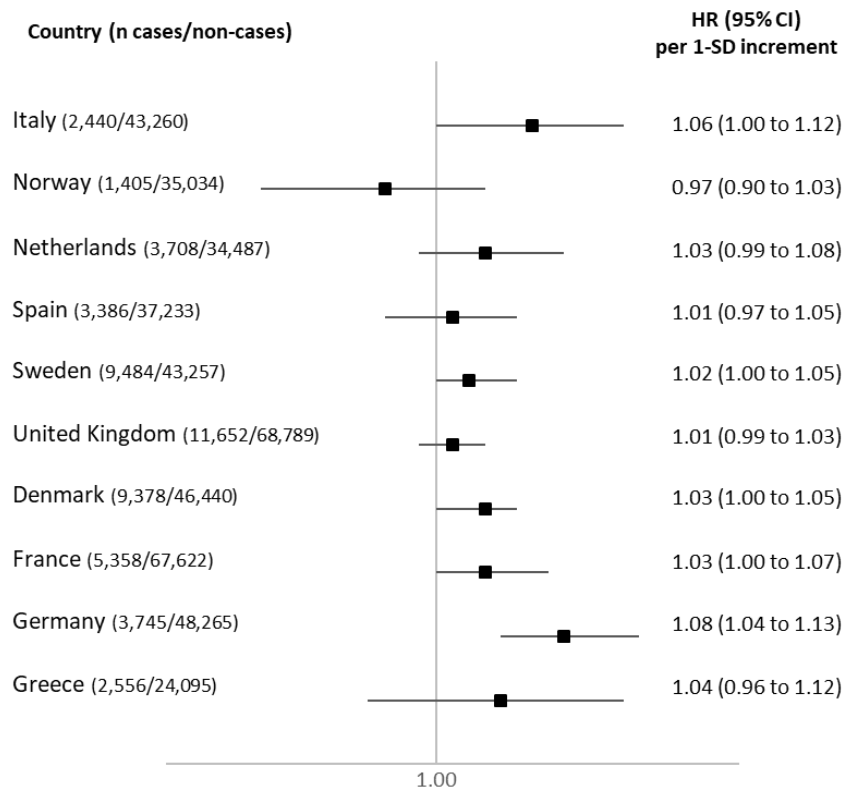

**Supplementary Figure 4. Associations between the FSAm-NPS DI and mortality from all non-external causes, non-linear modelling using restricted cubic splines, EPIC cohort, 1992–2015.**

A higher FSAm-NPS DI indicates a lower nutritional quality of the foods consumed. The Cox proportional hazard model was stratified for age (1-y interval) and study centre and adjusted for age (time-scale), sex, body mass index, height, educational level (longer education, including university degree; technical/professional school; secondary school; primary school; missing), combined total physical activity (sex-specific categories: active; moderately active; moderately inactive; inactive; missing), smoking status and intensity of smoking (current, 1–15 cigarettes/d; current, 16–25 cigarettes/d; current, 26+ cigarettes/d; current, pipe/cigar/occasional; current/former, missing; former, quit 11–20 y; former, quit 20+y; former, quit  $\leq 10$  y; non-smoker; missing), baseline alcohol intake, baseline energy intake and personal history of cancer (yes; no), cardiovascular diseases (yes; no; missing) and diabetes (yes; no; missing). Abbreviations: DI, Dietary Index; EPIC, European Prospective Investigation into Cancer and Nutrition; FSAm-NPS, Nutrient Profiling System of the British Food Standards Agency (modified version).

**A) Mortality, all causes**

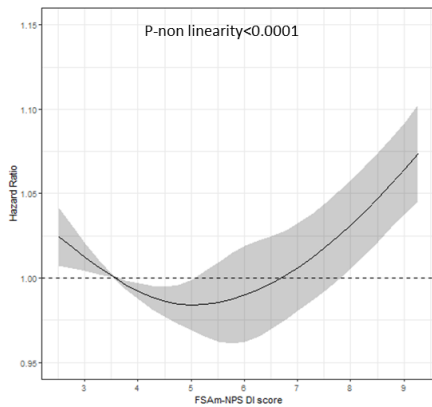

**B) Mortality, all non-external causes**

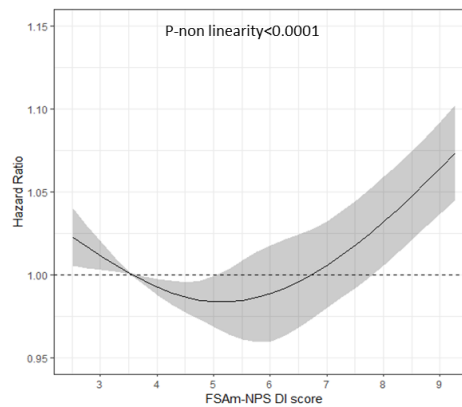

**C) Mortality from external causes**

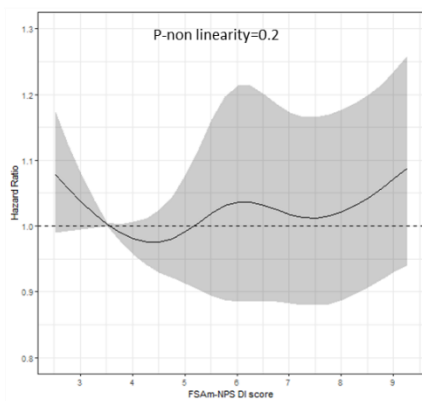

**D) Mortality from cancer**

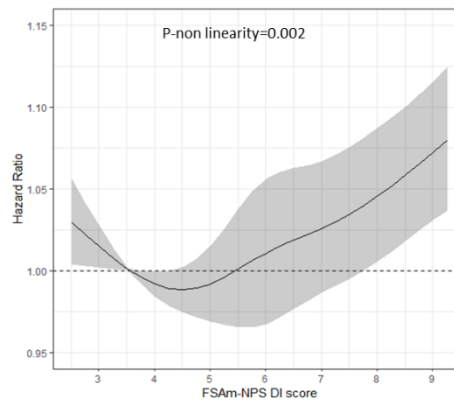

**E) Mortality from cardiovascular diseases**

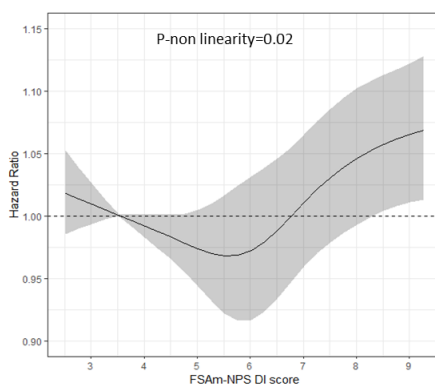

**F) Mortality from respiratory diseases**

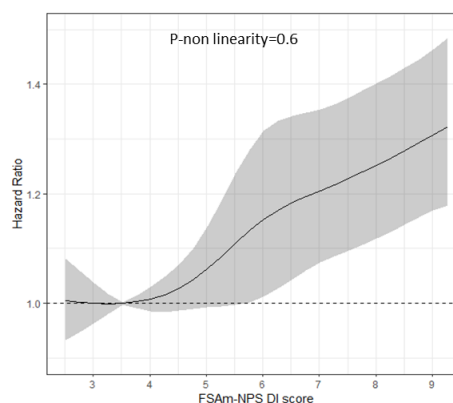

**G) Mortality from digestive diseases**

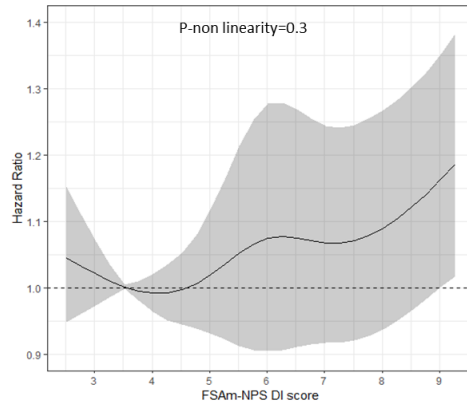

**Supplementary Table 1 – Associations between the FSAm-NPS DI and mortality, sensitivity analyses, EPIC cohort, 1992–2015.**

|                                                                                                        | Continuous<br>(per 1-SD increment) |         | Quintiles <sup>a</sup> |                        |                        |                        |                        | P-trend | P-<br>non-trend |
|--------------------------------------------------------------------------------------------------------|------------------------------------|---------|------------------------|------------------------|------------------------|------------------------|------------------------|---------|-----------------|
|                                                                                                        | HR (95%CI)                         | P-value | Q1                     | Q2                     | Q3                     | Q4                     | Q5                     |         |                 |
| <b>Mortality, all non-external causes</b>                                                              |                                    |         |                        |                        |                        |                        |                        |         |                 |
| <i>All (n for cases/non-cases)</i>                                                                     | 53,112/448,482                     |         | 10,515/89,803          | 9,605/90,714           | 9,922/90,397           | 10,728/89,591          | 12,342/87,977          |         |                 |
| Main model without BMI <sup>b</sup>                                                                    | 1.02 (1.02 to 1.03)                | <0.001  | 1.00 (ref)             | 0.99 (0.96 to 1.02)    | 0.99 (0.96 to 1.02)    | 1.01 (0.98 to 1.04)    | 1.06 (1.03 to 1.10)    | <0.001  | <0.001          |
| Main model without energy <sup>c</sup>                                                                 | 1.02 (1.01 to 1.03)                | <0.001  | 1.00 (ref)             | 0.98 (0.96 to 1.01)    | 0.98 (0.96 to 1.01)    | 1.00 (0.97 to 1.03)    | 1.05 (1.02 to 1.09)    | <0.001  | <0.001          |
| Main model + coffee intake <sup>d</sup>                                                                | 1.03 (1.02 to 1.04)                | <0.001  | 1.00 (ref)             | 0.99 (0.96 to 1.02)    | 0.99 (0.96 to 1.02)    | 1.01 (0.98 to 1.04)    | 1.07 (1.03 to 1.10)    | <0.001  | <0.001          |
| Main model + soft drinks intake <sup>e</sup>                                                           | 1.02 (1.01 to 1.03)                | <0.001  | 1.00 (ref)             | 0.98 (0.96 to 1.01)    | 0.98 (0.96 to 1.01)    | 1.00 (0.97 to 1.03)    | 1.05 (1.02 to 1.09)    | <0.001  | <0.001          |
| <i>Exclusion of participants with prevalent disease <sup>f</sup><br/>(n for cases/non-cases)</i>       | 20,209/288,259                     |         | 4,011/57,891           | 3,710/58,773           | 3,871/58,058           | 4,103/57,404           | 4,514/56,133           |         |                 |
| Main model without prevalent diseases <sup>g</sup>                                                     | 1.04 (1.02 to 1.05)                | <0.001  | 1.00 (ref)             | 0.99 (0.94 to 1.03)    | 1.01 (0.97 to 1.06)    | 1.02 (0.97 to 1.07)    | 1.13 (1.07 to 1.18)    | <0.001  | <0.001          |
| <i>Exclusion of cases with &lt; 5-year-follow-up <sup>h</sup> (n for cases/non-cases)</i>              | 45,248/448,482                     |         | 8,872/89,803           | 8,144/90,714           | 8,458/90,397           | 9,210/89,591           | 10,564/87,977          |         |                 |
| Main model                                                                                             | 1.02 (1.01 to 1.04)                | <0.001  | 1.00 (ref)             | 0.99 (0.96 to 1.02)    | 0.99 (0.96 to 1.02)    | 1.01 (0.98 to 1.05)    | 1.06 (1.03 to 1.10)    | <0.001  | <0.001          |
| <i>Complete case <sup>i</sup> (n for cases/non-cases)</i>                                              | 27,000/264,213                     |         | 6,747/60,149           | 5,332/56,515           | 4,988/52,782           | 4,927/49,682           | 5,006/45,085           |         |                 |
| Main model                                                                                             | 1.04 (1.02 to 1.05)                | <0.001  | 1.00 (ref)             | 0.97 (0.93 to 1.00)    | 1.00 (0.96 to 1.04)    | 1.01 (0.97 to 1.05)    | 1.10 (1.06 to 1.15)    | <0.001  | <0.001          |
| <i>Fine and Gray competing risks analysis <sup>j</sup><br/>(n for cases/competing cases/non-cases)</i> | 53,112/1,839/<br>446,643           |         | 10,515/372/<br>89,431  | 9,605/329/90,385       | 9,922/353/90,044       | 10,728/370/<br>89,221  | 12,342/415/<br>87,562  |         |                 |
| Main model                                                                                             | 1.03 (1.02 to 1.04)                | <0.001  | 1.00 (ref)             | 0.99 (0.96 to 1.02)    | 0.99 (0.96 to 1.02)    | 1.01 (0.98 to 1.04)    | 1.07 (1.03 to 1.10)    | <0.001  | <0.001          |
| <b>Mortality from cancer</b>                                                                           |                                    |         |                        |                        |                        |                        |                        |         |                 |
| <i>All (n for cases/non-cases)</i>                                                                     | 23,143/478,451                     |         | 4,550/95,768           | 4,288/96,031           | 4,482/95,837           | 4,700/95,619           | 5,123/95,196           |         |                 |
| Main model without BMI                                                                                 | 1.03 (1.01 to 1.04)                | <0.001  | 1.00 (ref)             | 0.99 (0.95 to 1.04)    | 1.02 (0.98 to 1.07)    | 1.03 (0.99 to 1.08)    | 1.08 (1.03 to 1.13)    | <0.001  | 0.005           |
| Main model without energy                                                                              | 1.02 (1.01 to 1.04)                | 0.003   | 1.00 (ref)             | 0.99 (0.95 to 1.03)    | 1.01 (0.97 to 1.06)    | 1.02 (0.98 to 1.07)    | 1.06 (1.02 to 1.11)    | 0.002   | 0.01            |
| Main model + coffee intake                                                                             | 1.03 (1.01 to 1.04)                | <0.001  | 1.00 (ref)             | 0.99 (0.95 to 1.03)    | 1.02 (0.97 to 1.06)    | 1.03 (0.98 to 1.08)    | 1.08 (1.03 to 1.13)    | <0.001  | 0.004           |
| Main model + soft drinks intake                                                                        | 1.03 (1.01 to 1.04)                | <0.001  | 1.00 (ref)             | 0.99 (0.95 to 1.03)    | 1.02 (0.97 to 1.06)    | 1.03 (0.98 to 1.08)    | 1.07 (1.02 to 1.12)    | <0.001  | 0.006           |
| <i>Exclusion of participants with prevalent disease<br/>(n for cases/non-cases)</i>                    | 10,264/298,204                     |         | 2,087/59,815           | 1,924/60,559           | 2,056/59,873           | 2,090/59,417           | 2,107/58,540           |         |                 |
| Main model without prevalent diseases                                                                  | 1.03 (1.01 to 1.05)                | 0.01    | 1.00 (ref)             | 0.98 (0.92 to 1.05)    | 1.05 (0.98 to 1.12)    | 1.05 (0.98 to 1.13)    | 1.12 (1.04 to 1.20)    | <0.001  | 0.003           |
| <i>Exclusion of cases with &lt; 5-year-follow-up<br/>(n for cases/non-cases)</i>                       | 18,958/478,451                     |         | 3,709/95,768           | 3,542/96,031           | 3,672/95,837           | 3,853/95,619           | 4,182/95,196           |         |                 |
| Main model                                                                                             | 1.03 (1.01 to 1.04)                | 0.002   | 1.00 (ref)             | 1.01 (0.96 to 1.06)    | 1.02 (0.97 to 1.07)    | 1.04 (0.99 to 1.09)    | 1.08 (1.03 to 1.14)    | 0.001   | 0.02            |
| <i>Complete case (n for cases/non-cases)</i>                                                           | 12,498/278,715                     |         | 2,961/63,935           | 2,522/59,325           | 2,425/55,345           | 2,375/52,234           | 2,215/47,876           |         |                 |
| Main model                                                                                             | 1.02 (1.00 to 1.05)                | 0.03    | 1.00 (ref)             | 0.99 (0.94 to 1.05)    | 1.04 (0.98 to 1.10)    | 1.05 (0.99 to 1.11)    | 1.07 (1.01 to 1.14)    | 0.01    | 0.09            |
| <i>Fine and Gray competing risks analysis<br/>(n for cases/competing cases/non-cases)</i>              | 23,143/31,808/<br>446,643          |         | 4,550/6,337/<br>89,431 | 4,288/5,646/<br>90,385 | 4,482/5,793/<br>90,044 | 4,700/6,398/<br>89,221 | 5,123/7,634/<br>87,562 |         |                 |
| Main model                                                                                             | 1.02 (1.01 to 1.04)                | 0.003   | 1.00 (ref)             | 0.99 (0.95 to 1.03)    | 1.02 (0.98 to 1.06)    | 1.03 (0.98 to 1.08)    | 1.07 (1.02 to 1.12)    | 0.002   | 0.01            |
| <b>Mortality from diseases of the circulatory system</b>                                               |                                    |         |                        |                        |                        |                        |                        |         |                 |
| <i>All (n for cases/non-cases)</i>                                                                     | 13,246/488,348                     |         | 2,973/97,345           | 2,432/97,887           | 2,377/97,942           | 2,526/97,793           | 2,938/97,381           |         |                 |
| Main model without BMI                                                                                 | 1.02 (1.00 to 1.04)                | 0.04    | 1.00 (ref)             | 0.96 (0.91 to 1.02)    | 0.97 (0.91 to 1.03)    | 1.00 (0.94 to 1.06)    | 1.04 (0.98 to 1.11)    | 0.09    | 0.06            |
| Main model without energy                                                                              | 1.02 (1.00 to 1.04)                | 0.04    | 1.00 (ref)             | 0.96 (0.91 to 1.01)    | 0.96 (0.91 to 1.02)    | 0.99 (0.94 to 1.05)    | 1.04 (0.98 to 1.10)    | 0.07    | 0.02            |
| Main model + coffee intake                                                                             | 1.02 (1.00 to 1.04)                | 0.03    | 1.00 (ref)             | 0.96 (0.91 to 1.01)    | 0.96 (0.91 to 1.02)    | 1.00 (0.94 to 1.06)    | 1.05 (0.99 to 1.11)    | 0.05    | 0.02            |
| Main model + soft drinks intake                                                                        | 1.02 (1.00 to 1.04)                | 0.08    | 1.00 (ref)             | 0.96 (0.90 to 1.01)    | 0.96 (0.90 to 1.02)    | 0.99 (0.93 to 1.05)    | 1.03 (0.97 to 1.10)    | 0.15    | 0.04            |

|                                                                                       |                           |        |                        |                        |                        |                        |                        |        |        |
|---------------------------------------------------------------------------------------|---------------------------|--------|------------------------|------------------------|------------------------|------------------------|------------------------|--------|--------|
| <i>Exclusion of participants with prevalent disease (n for cases/non-cases)</i>       | 3,569/304,899             |        | 857/61,045             | 678/61,805             | 645/61,284             | 642/60,865             | 747/59,900             |        |        |
| Main model without prevalent diseases                                                 | 1.04 (1.00 to 1.08)       | 0.04   | 1.00 (ref)             | 0.89 (0.80 to 0.99)    | 0.95 (0.85 to 1.06)    | 0.94 (0.83 to 1.05)    | 1.10 (0.98 to 1.23)    | 0.09   | 0.003  |
| <i>Exclusion of cases with &lt; 5-year-follow-up (n for cases/non-cases)</i>          | 10,827/488,348            |        | 2,414/97,345           | 1,960/97,887           | 1,944/97,942           | 2,095/97,793           | 2,414/97,381           |        |        |
| Main model                                                                            | 1.02 (1.00 to 1.04)       | 0.10   | 1.00 (ref)             | 0.94 (0.89 to 1.00)    | 0.95 (0.89 to 1.01)    | 0.99 (0.93 to 1.06)    | 1.03 (0.96 to 1.10)    | 0.14   | 0.02   |
| <i>Complete case (n for cases/non-cases)</i>                                          | 7,117/284,096             |        | 2,046/64,850           | 1,400/60,447           | 1,220/56,550           | 1,182/53,427           | 1,269/48,822           |        |        |
| Main model                                                                            | 1.04 (1.01 to 1.07)       | 0.006  | 1.00 (ref)             | 0.91 (0.85 to 0.98)    | 0.96 (0.88 to 1.04)    | 0.99 (0.91 to 1.08)    | 1.13 (1.03 to 1.22)    | 0.004  | <0.001 |
| <i>Fine and Gray competing risks analysis (n for cases/competing cases/non-cases)</i> | 13,246/41,705/<br>446,643 |        | 2,973/7,914/<br>89,431 | 2,432/7,502/90,38<br>5 | 2,377/7,898/90,04<br>4 | 2,526/8,572/<br>89,221 | 2,938/9,819/<br>87,562 |        |        |
| Main model                                                                            | 1.01 (0.99 to 1.03)       | 0.17   | 1.00 (ref)             | 0.96 (0.9 to 1.01)     | 0.96 (0.90 to 1.02)    | 0.99 (0.93 to 1.05)    | 1.02 (0.96 to 1.09)    | 0.24   | 0.09   |
| <b>Mortality from diseases of the respiratory system</b>                              |                           |        |                        |                        |                        |                        |                        |        |        |
| <i>All (n for cases/non-cases)</i>                                                    | 2,857/498,737             |        | 508/99,810             | 501/99,818             | 507/99,812             | 591/99,728             | 750/99,569             |        |        |
| Main model without BMI                                                                | 1.11 (1.07 to 1.16)       | <0.001 | 1.00 (ref)             | 1.14 (1.01 to 1.30)    | 1.15 (1.01 to 1.32)    | 1.27 (1.11 to 1.45)    | 1.40 (1.23 to 1.60)    | <0.001 | <0.001 |
| Main model without energy                                                             | 1.10 (1.06 to 1.14)       | <0.001 | 1.00 (ref)             | 1.14 (1.00 to 1.30)    | 1.14 (1.00 to 1.30)    | 1.25 (1.09 to 1.42)    | 1.36 (1.19 to 1.54)    | <0.001 | <0.001 |
| Main model + coffee intake                                                            | 1.11 (1.06 to 1.15)       | <0.001 | 1.00 (ref)             | 1.15 (1.01 to 1.31)    | 1.16 (1.01 to 1.32)    | 1.27 (1.11 to 1.45)    | 1.39 (1.22 to 1.59)    | <0.001 | <0.001 |
| Main model + soft drinks intake                                                       | 1.10 (1.06 to 1.15)       | <0.001 | 1.00 (ref)             | 1.15 (1.01 to 1.30)    | 1.15 (1.01 to 1.32)    | 1.26 (1.10 to 1.44)    | 1.37 (1.20 to 1.57)    | <0.001 | <0.001 |
| <i>Exclusion of participants with prevalent disease (n for cases/non-cases)</i>       | 1,085/307,383             |        | 205/61,697             | 213/62,270             | 174/61,755             | 227/61,280             | 266/60,381             |        |        |
| Main model without prevalent diseases                                                 | 1.08 (1.00 to 1.15)       | 0.03   | 1.00 (ref)             | 1.16 (0.95 to 1.42)    | 0.96 (0.77 to 1.19)    | 1.17 (0.94 to 1.46)    | 1.33 (1.07 to 1.64)    | 0.01   | 0.01   |
| <i>Exclusion of cases with &lt; 5-year-follow-up (n for cases/non-cases)</i>          | 2,575/498,737             |        | 454/99,810             | 458/99,818             | 456/99,812             | 538/99,728             | 669/99,569             |        |        |
| Main model                                                                            | 1.10 (1.06 to 1.15)       | <0.001 | 1.00 (ref)             | 1.17 (1.02 to 1.34)    | 1.14 (0.99 to 1.32)    | 1.26 (1.10 to 1.45)    | 1.37 (1.19 to 1.57)    | <0.001 | <0.001 |
| <i>Complete case (n for cases/non-cases)</i>                                          | 1,470/289,743             |        | 332/66,564             | 309/61,538             | 246/57,524             | 278/54,331             | 305/49,786             |        |        |
| Main model                                                                            | 1.11 (1.05 to 1.18)       | <0.001 | 1.00 (ref)             | 1.23 (1.04 to 1.45)    | 1.12 (0.93 to 1.34)    | 1.29 (1.07 to 1.54)    | 1.48 (1.23 to 1.78)    | <0.001 | <0.001 |
| <i>Fine and Gray competing risks analysis (n for cases/competing cases/non-cases)</i> | 2,857/52,094/<br>446,643  |        | 508/10,379/<br>89,431  | 501/9,433/90,385       | 507/9,768/90,044       | 591/10,507/<br>89,221  | 750/12,007/<br>87,562  |        |        |
| Main model                                                                            | 1.10 (1.05 to 1.14)       | <0.001 | 1.00 (ref)             | 1.15 (1.02 to 1.31)    | 1.16 (1.01 to 1.32)    | 1.26 (1.11 to 1.43)    | 1.37 (1.20 to 1.56)    | <0.001 | <0.001 |
| <b>Mortality from diseases of the digestive system</b>                                |                           |        |                        |                        |                        |                        |                        |        |        |
| <i>All (n for cases/non-cases)</i>                                                    | 1,561/500,033             |        | 294/100,024            | 286/100,033            | 282/100,037            | 326/99,993             | 373/99,946             |        |        |
| Main model without BMI                                                                | 1.07 (1.01 to 1.13)       | 0.01   | 1.00 (ref)             | 1.09 (0.92 to 1.29)    | 1.05 (0.88 to 1.25)    | 1.15 (0.97 to 1.37)    | 1.21 (1.01 to 1.44)    | 0.03   | 0.23   |
| Main model without energy                                                             | 1.05 (1.00 to 1.11)       | 0.05   | 1.00 (ref)             | 1.07 (0.90 to 1.26)    | 1.02 (0.86 to 1.22)    | 1.12 (0.94 to 1.33)    | 1.16 (0.97 to 1.37)    | 0.08   | 0.41   |
| Main model + coffee intake                                                            | 1.08 (1.02 to 1.14)       | 0.006  | 1.00 (ref)             | 1.10 (0.93 to 1.30)    | 1.07 (0.90 to 1.27)    | 1.18 (0.99 to 1.41)    | 1.24 (1.04 to 1.48)    | 0.01   | 0.12   |
| Main model + soft drinks intake                                                       | 1.07 (1.01 to 1.13)       | 0.02   | 1.00 (ref)             | 1.08 (0.91 to 1.28)    | 1.04 (0.87 to 1.24)    | 1.14 (0.96 to 1.36)    | 1.19 (1.00 to 1.42)    | 0.04   | 0.29   |
| <i>Exclusion of participants with prevalent disease (n for cases/non-cases)</i>       | 589/307,879               |        | 113/61,789             | 118/62,365             | 101/61,828             | 118/61,389             | 139/60,508             |        |        |
| Main model without prevalent diseases                                                 | 1.08 (0.99 to 1.19)       | 0.09   | 1.00 (ref)             | 1.21 (0.92 to 1.59)    | 1.05 (0.79 to 1.41)    | 1.18 (0.89 to 1.58)    | 1.34 (1.00 to 1.80)    | 0.07   | 0.26   |
| <i>Exclusion of cases with &lt; 5-year-follow-up (n for cases/non-cases)</i>          | 1,315/500,033             |        | 256/100,024            | 239/100,033            | 233/100,037            | 267/99,993             | 320/99,946             |        |        |
| Main model                                                                            | 1.07 (1.00 to 1.13)       | 0.04   | 1.00 (ref)             | 1.04 (0.87 to 1.25)    | 0.99 (0.82 to 1.20)    | 1.09 (0.90 to 1.31)    | 1.20 (0.99 to 1.45)    | 0.05   | 0.23   |
| <i>Complete case (n for cases/non-cases)</i>                                          | 901/290,312               |        | 207/66,689             | 171/61,676             | 165/57,605             | 173/54,436             | 185/49,906             |        |        |
| Main model                                                                            | 1.12 (1.04 to 1.21)       | 0.004  | 1.00 (ref)             | 0.99 (0.80 to 1.23)    | 1.06 (0.85 to 1.33)    | 1.14 (0.91 to 1.43)    | 1.30 (1.03 to 1.64)    | 0.02   | 0.14   |
| <i>Fine and Gray competing risks analysis (n for cases/competing cases/non-cases)</i> | 1,561/53,390/<br>446,643  |        | 294/10,593/<br>89,431  | 286/9,648/90,385       | 282/9,993/90,044       | 326/10,772/<br>89,221  | 373/12,384/<br>87,562  |        |        |
| Main model                                                                            | 1.07 (1.01 to 1.13)       | 0.03   | 1.00 (ref)             | 1.07 (0.91 to 1.27)    | 1.04 (0.87 to 1.24)    | 1.14 (0.95 to 1.36)    | 1.19 (1.00 to 1.43)    | 0.04   | 0.29   |

<sup>a</sup> Cut-offs for sex-specific quintiles of the FSAm-NPS DI were, for women: 4.14/5.35/6.43/7.68, for men: 4.32/5.55/6.63/7.88. A higher FSAm-NPS DI indicates a lower nutritional quality of the foods consumed. The main model was stratified for age (1-y interval) and study centre and adjusted for age (time-scale), sex, body mass index, height, educational level (longer education, including university degree; technical/professional school; secondary school; primary school; missing), combined total physical activity (sex-specific categories: active; moderately active; moderately inactive; inactive; missing), smoking status and intensity of smoking (current, 1–15 cigarettes/d; current, 16–25 cigarettes/d; current, 26+ cigarettes/d; current, pipe/cigar/occasional; current/former, missing; former, quit 11–20 y; former, quit 20+y; former, quit ≤10 y; non-smoker; missing), baseline alcohol intake, baseline energy intake and personal history of cancer (yes; no), cardiovascular diseases (yes; no; missing) and diabetes (yes; no; missing).

<sup>b</sup> Main model without adjustment for BMI.

<sup>c</sup> Main model without adjustment for energy intake.

<sup>d</sup> Main model with additional adjustment for coffee intake.

<sup>e</sup> Main model with additional adjustment for soft drinks intake

<sup>f</sup> Exclusion of participants who declared a prevalent cancer, cardiovascular disease or diabetes at baseline (n=122,857).

<sup>g</sup> Main model without adjustment for personal history of cancer, cardiovascular diseases and diabetes.

<sup>h</sup> Exclusion of participants whose death occurred during the first 5 years of follow-up (n=7,854).

<sup>i</sup> Missing data in covariates was handled using a complete case approach, i.e. by excluding participants with missing data on covariates (n=210,381)

<sup>j</sup> Competing risk analyses using Fine and Gray models

Abbreviations: BMI, body mass index; DI, Dietary Index; EPIC, European Prospective Investigation into Cancer and Nutrition; FSAm-NPS, Nutrient Profiling System of the British Food Standards Agency (modified version)



**Supplementary Table 2 – Associations between the FSAm-NPS DI and all-cause mortality, analyses of mediation through BMI variation during follow-up, EPIC cohort, 1992–2015.**

|                                                                           | Quintiles <sup>a</sup> |                     |                     |                     |                     |
|---------------------------------------------------------------------------|------------------------|---------------------|---------------------|---------------------|---------------------|
|                                                                           | Q1                     | Q2                  | Q3                  | Q4                  | Q5                  |
|                                                                           | HR (95%CI)             | HR (95%CI)          | HR (95%CI)          | HR (95%CI)          | HR (95%CI)          |
| <b>Mortality, all non-external causes</b> ( <i>n</i> for cases/non-cases) | 5,304/58,939           | 4,969/58,632        | 5,651/64,444        | 6,446/68,346        | 7,347/68,244        |
| Total effect                                                              | 1.00 (ref)             | 1.00 (0.97 to 1.05) | 0.99 (0.95 to 1.03) | 1.01 (0.97 to 1.05) | 1.04 (1.00 to 1.09) |
| Direct effect                                                             | 1.00 (ref)             | 1.00 (0.99 to 1.02) | 0.99 (0.97 to 1.01) | 1.01 (0.99 to 1.03) | 1.04 (1.02 to 1.06) |
| Indirect effect through BMI variation during follow-up <sup>b</sup>       | 1.00 (ref)             | 1.00 (0.99 to 1.02) |
| <b>Mortality from cancer</b>                                              | 2,433/61,810           | 2,233/61,368        | 2,560/67,535        | 2,842/71,950        | 3,053/72,538        |
| Total effect                                                              | 1.00 (ref)             | 0.99 (0.94 to 1.05) | 1.02 (0.96 to 1.08) | 1.04 (0.98 to 1.10) | 1.05 (0.99 to 1.12) |
| Direct effect                                                             | 1.00 (ref)             | 0.99 (0.97 to 1.02) | 1.02 (0.99 to 1.05) | 1.03 (1.01 to 1.06) | 1.05 (1.02 to 1.08) |
| Indirect effect through BMI variation during follow-up                    | 1.00 (ref)             | 1.00 (0.98 to 1.03) |
| <b>Mortality from diseases of the circulatory system</b>                  | 1,268/62,975           | 1,097/62,504        | 1,235/68,860        | 1,357/73,435        | 1,548/74,043        |
| Total effect                                                              | 1.00 (ref)             | 0.98 (0.90 to 1.06) | 0.97 (0.89 to 1.06) | 1.00 (0.92 to 1.09) | 1.01 (0.92 to 1.10) |
| Direct effect                                                             | 1.00 (ref)             | 0.98 (0.94 to 1.02) | 0.98 (0.94 to 1.02) | 1.00 (0.96 to 1.04) | 1.00 (0.96 to 1.04) |
| Indirect effect through BMI variation during follow-up                    | 1.00 (ref)             | 1.00 (0.97 to 1.04) |
| <b>Mortality from diseases of the respiratory system</b>                  | 247/63,996             | 256/63,345          | 279/69,816          | 326/74,466          | 414/75,177          |
| Total effect                                                              | 1.00 (ref)             | 1.18 (0.98 to 1.42) | 1.14 (0.95 to 1.37) | 1.21 (1.01 to 1.45) | 1.33 (1.11 to 1.59) |
| Direct effect                                                             | 1.00 (ref)             | 1.16 (1.07 to 1.26) | 1.12 (1.04 to 1.22) | 1.20 (1.10 to 1.30) | 1.32 (1.21 to 1.43) |
| Indirect effect through BMI variation during follow-up                    | 1.00 (ref)             | 1.00 (0.94 to 1.08) | 1.00 (0.94 to 1.08) | 1.00 (0.94 to 1.08) | 1.00 (0.93 to 1.08) |
| <b>Mortality from diseases of the digestive system</b>                    | 158/64,085             | 140/63,461          | 150/69,945          | 171/74,621          | 202/75,389          |
| Total effect                                                              | 1.00 (ref)             | 1.04 (0.82 to 1.31) | 1.00 (0.79 to 1.27) | 1.06 (0.84 to 1.35) | 1.15 (0.90 to 1.46) |
| Direct effect                                                             | 1.00 (ref)             | 1.03 (0.93 to 1.15) | 1.00 (0.90 to 1.12) | 1.06 (0.95 to 1.18) | 1.13 (1.01 to 1.27) |
| Indirect effect through BMI variation during follow-up                    | 1.00 (ref)             | 1.01 (0.91 to 1.11) | 1.01 (0.91 to 1.11) | 1.01 (0.91 to 1.11) | 1.00 (0.91 to 1.11) |

<sup>a</sup> Cut-offs for sex-specific quintiles of the FSAm-NPS DI were, for women: 4.14/5.35/6.43/7.68, for men: 4.32/5.55/6.63/7.88. A higher FSAm-NPS DI indicates a lower nutritional quality of the foods consumed. The model was stratified for age (1-y interval) and study centre and adjusted for age (time-scale), sex, height, educational level (longer education, including university degree; technical/professional school; secondary school; primary school; missing), combined total physical activity (sex-specific categories: active; moderately active; moderately inactive; inactive; missing), smoking status and intensity of smoking (current, 1–15 cigarettes/d; current, 16–25 cigarettes/d; current, 26+ cigarettes/d; current, pipe/cigar/occasional; current/former, missing; former, quit 11–20 y; former, quit 20+y; former, quit ≤10 y; non-smoker; missing), baseline alcohol intake, baseline energy intake and personal history of cancer (yes; no), cardiovascular diseases (yes; no; missing) and diabetes (yes; no; missing).

<sup>b</sup> Analyses of mediation through BMI variation during follow-up conducted using the method proposed by Lange et al. (doi:10.1093/aje/kwr525)

**Supplementary Table 3. E-values for HR and 95% confidence intervals, associations between the FSAm-NPS DI and mortality, EPIC cohort, 1992–2015.**

|                                                          | Continuous<br>(per 1-SD increment) |             | Q1         | Q2                  | Q3          | Q4                  | Q5          |                     |             |                     |             |
|----------------------------------------------------------|------------------------------------|-------------|------------|---------------------|-------------|---------------------|-------------|---------------------|-------------|---------------------|-------------|
|                                                          | HR (95%CI)                         | E-value     | HR (95%CI) | HR (95%CI)          | E-value     | HR (95%CI)          | E-value     | HR (95%CI)          | E-value     |                     |             |
| <b>Mortality, all causes</b>                             | 1.02 (1.01 to 1.03)                | 1.16 (1.11) | 1.00 (ref) | 0.98 (0.96 to 1.01) | 1.16 (1.00) | 0.99 (0.96 to 1.02) | 1.11 (1.00) | 1.01 (0.98 to 1.04) | 1.11 (1.00) | 1.06 (1.03 to 1.09) | 1.31 (1.21) |
| <b>Mortality, all non-external causes</b>                | 1.03 (1.02 to 1.04)                | 1.21 (1.16) | 1.00 (ref) | 0.94 (0.81 to 1.10) | 1.32 (1.00) | 0.98 (0.84 to 1.15) | 1.16 (1.00) | 0.96 (0.82 to 1.13) | 1.25 (1.00) | 1.07 (1.03 to 1.1)  | 1.34 (1.21) |
| <b>Mortality, external causes</b>                        | 1.00 (0.95 to 1.05)                | 1.00 (1.00) | 1.00 (ref) | 0.99 (0.96 to 1.02) | 1.11 (1.00) | 0.99 (0.96 to 1.02) | 1.11 (1.00) | 1.01 (0.98 to 1.04) | 1.11 (1.00) | 0.99 (0.84 to 1.16) | 1.11 (1.00) |
| <b>Mortality from cancer</b>                             | 1.03 (1.01 to 1.04)                | 1.21 (1.11) | 1.00 (ref) | 0.99 (0.95 to 1.04) | 1.11 (1.00) | 1.02 (0.98 to 1.07) | 1.16 (1.00) | 1.03 (0.99 to 1.08) | 1.21 (1.00) | 1.08 (1.03 to 1.13) | 1.37 (1.21) |
| <b>Mortality from diseases of the circulatory system</b> | 1.02 (1.00 to 1.04)                | 1.16 (1.00) | 1.00 (ref) | 0.96 (0.91 to 1.01) | 1.25 (1.00) | 0.96 (0.91 to 1.02) | 1.25 (1.00) | 1.00 (0.94 to 1.06) | 1.00 (1.00) | 1.04 (0.98 to 1.11) | 1.24 (1.00) |
| <b>Mortality from diseases of the respiratory system</b> | 1.11 (1.06 to 1.15)                | 1.46 (1.31) | 1.00 (ref) | 1.15 (1.01 to 1.31) | 1.57 (1.11) | 1.16 (1.01 to 1.32) | 1.59 (1.11) | 1.27 (1.11 to 1.45) | 1.86 (1.46) | 1.39 (1.22 to 1.59) | 2.13 (1.74) |
| <b>Mortality from diseases of the digestive system</b>   | 1.08 (1.02 to 1.14)                | 1.37 (1.16) | 1.00 (ref) | 1.08 (0.91 to 1.28) | 1.37 (1.00) | 1.05 (0.88 to 1.25) | 1.28 (1.00) | 1.15 (0.97 to 1.37) | 1.57 (1.00) | 1.22 (1.02 to 1.45) | 1.74 (1.16) |

Cut-offs for sex-specific quintiles of the FSAm-NPS DI were, for women: 4.14/5.35/6.43/7.68, for men: 4.32/5.55/6.63/7.88. A higher FSAm-NPS DI indicates a lower nutritional quality of the foods consumed. The model was stratified for age (1-y interval) and study centre and adjusted for age (time-scale), sex, height, educational level (longer education, including university degree; technical/professional school; secondary school; primary school; missing), combined total physical activity (sex-specific categories: active; moderately active; moderately inactive; inactive; missing), smoking status and intensity of smoking (current, 1–15 cigarettes/d; current, 16–25 cigarettes/d; current, 26+ cigarettes/d; current, pipe/cigar/occasional; current/former, missing; former, quit 11–20 y; former, quit 20+y; former, quit ≤10 y; non-smoker; missing), baseline alcohol intake, baseline energy intake and personal history of cancer (yes; no), cardiovascular diseases (yes; no; missing) and diabetes (yes; no; missing). E-values were calculated from Mathur et al. (doi:10.1097/EDE.0000000000000864) and VanderWeele et al. (doi:10.7326/M16-2607).
